# Supplementary material for: Fluorescent Sensing of Ciprofloxacin and Chloramphenicol in Milk Samples via Inner Filter Effect and Photoinduced Electron Transfer Based on Nanosized Rod-Shaped Eu-MOF
Source: Foods. 2022 Oct 9;11(19):3138. doi: 10.3390/foods11193138 (PMC9562874; doi:10.3390/foods11193138)
Supplement: Supplementary file 1 [file foods-11-03138-s001.zip › foods-1944355-supplementary.pdf]

# **Fluorescent Sensing of Ciprofloxacin and Chloramphenicol in milk samples via Inner Filter Effect (IFE) and Photoinduced Electron Transfer based on nanosized rod-shaped Eu-MOF**

Xiaoyue Yue <sup>1,3</sup>, Chaoyun Wu<sup>1</sup>, Zijun Zhou <sup>2</sup>, Long Fu<sup>1</sup>, Yanhong Bai <sup>1,3,\*</sup>

<sup>1</sup> College of Food and Bioengineering, Zhengzhou University of Light Industry, Zhengzhou 450001, China

<sup>2</sup> Henan Institute of Product Quality Supervision and Inspection, Zhengzhou 450001, China

<sup>3</sup> Henan Key Laboratory of Cold Chain Food Quality and Safety Control, Zhengzhou 450001, China

\* Correspondence: baiyanhong212@163.com

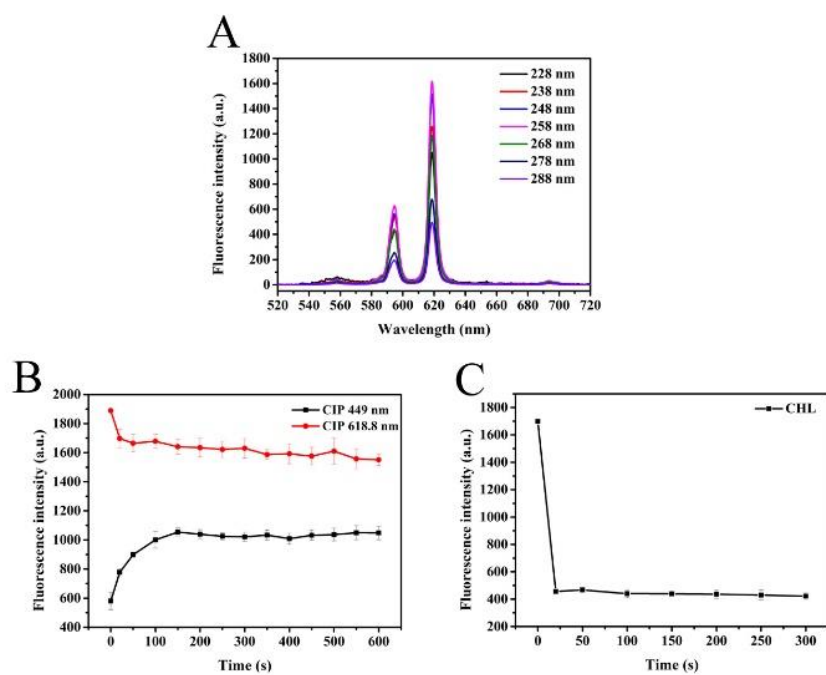

**Figure. S1** (A) Fluorescence emission spectra of Eu-MOF at different excitation wavelengths; (B) Fluorescence intensity of Eu-MOF at 449 nm and 618.8 nm after the addition of ciprofloxacin with time; (C) Fluorescence intensity of Eu-MOF at 618.8 nm after the addition of chloramphenicol with time

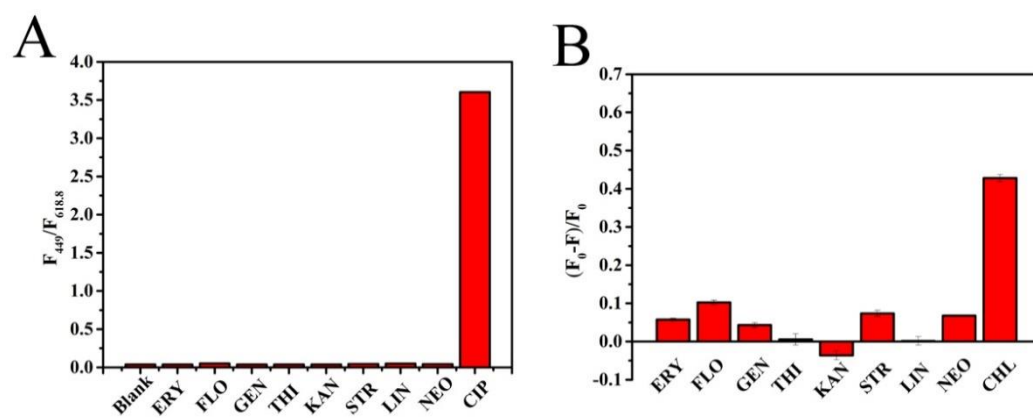

**Figure. S2.** (A) The  $F_{449}/F_{618.8}$  and (B)  $(F_0 - F)/F_0$  at 618.8nm of the Eu-MOF against various antibiotics.
